# Supplementary figures and images for: Impaired mucociliary motility enhances antigen-specific nasal IgA immune responses to a cholera toxin-based nasal vaccine
Source: PubMed Central journal article supplement — Int Immunol. 2020 Apr 29;32(8):559–68. doi: 10.1093/intimm/dxaa029 (PMC9262165; doi:10.1093/intimm/dxaa029), 2020-04-29

# Supplementary Figure 1

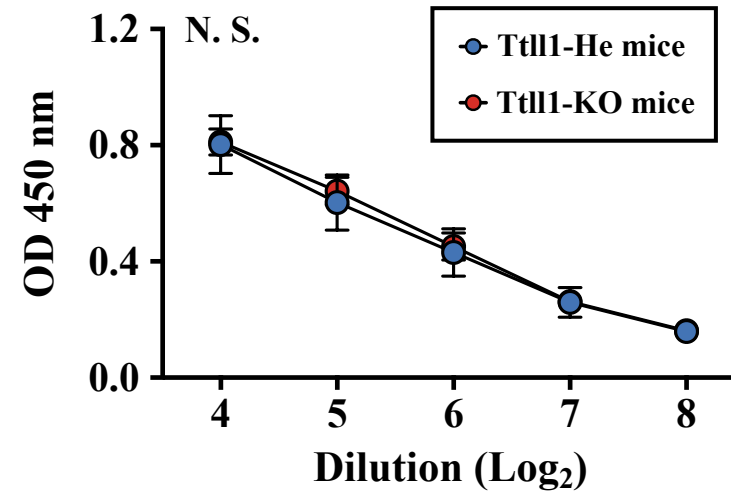

## Supplementary Figure 2

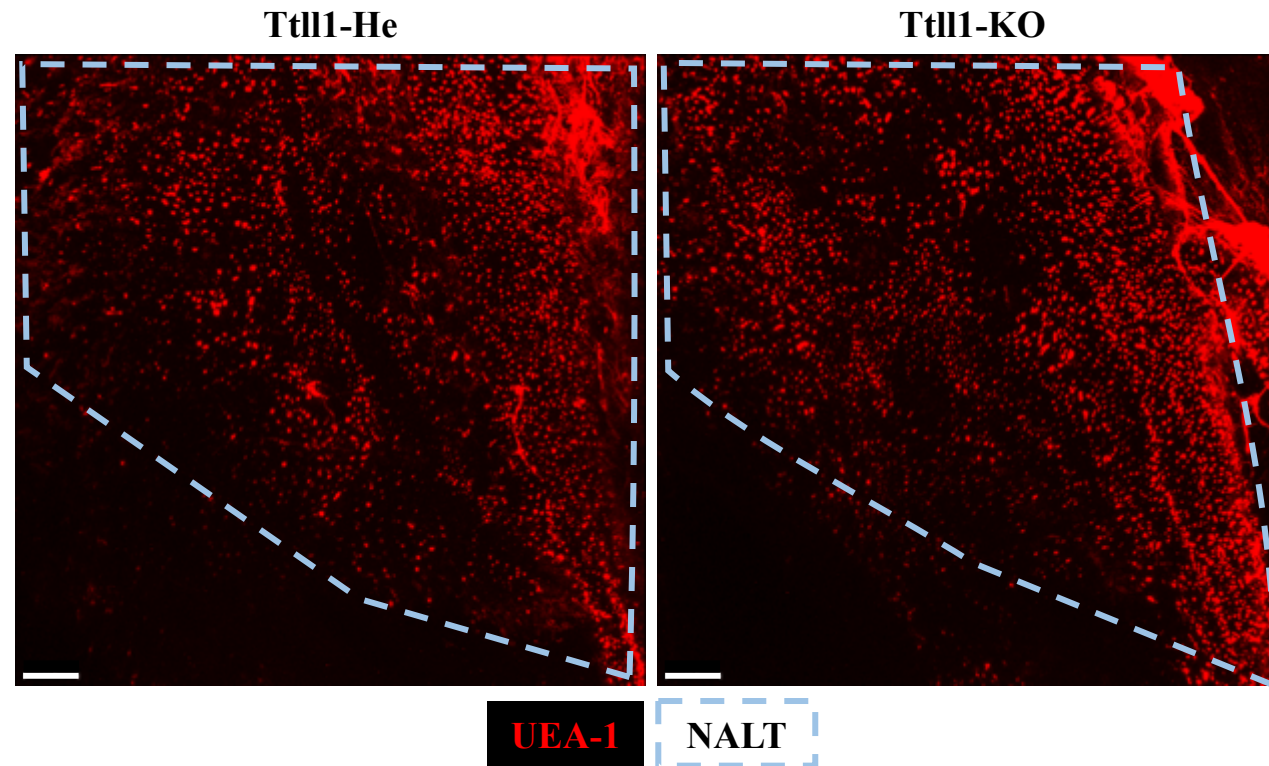

# Supplementary Figure 3

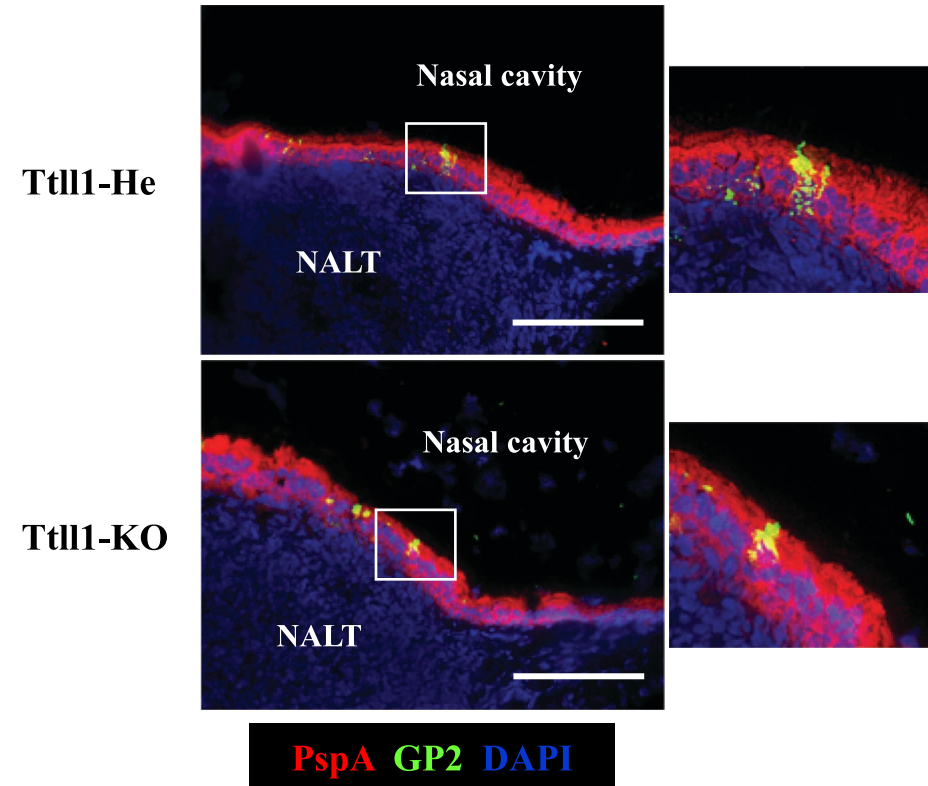

# Supplementary Figure 4

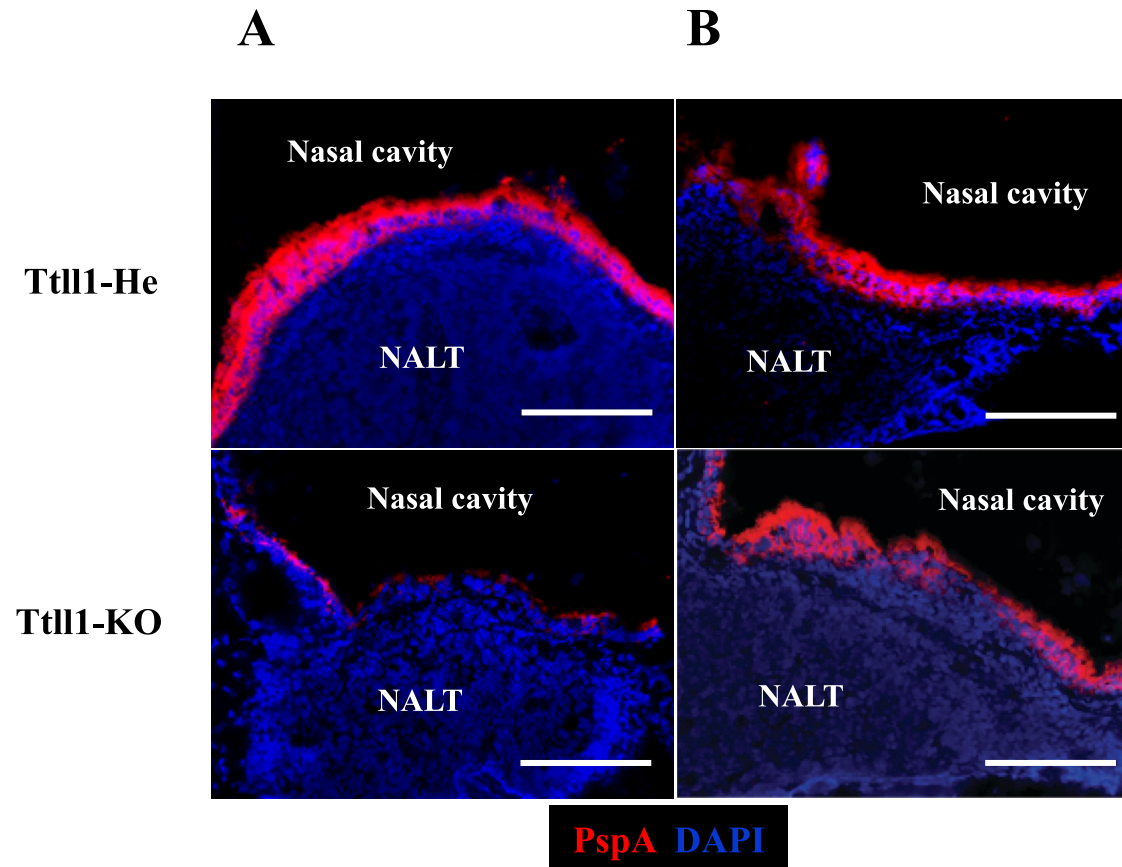

Supplement: dxaa029_suppl_supplementary_figures_1-4.pdf [file dxaa029_suppl_supplementary_figures_1-4.pdf]
